# Supplementary material for: Allicin Inhibits Porcine Reproductive and Respiratory Syndrome Virus Infection In Vitro and Alleviates Inflammatory Responses
Source: MDPI journal article supplement (doi:10.3390/v15051050), 2023-04-25
Supplement: s1 [file s1]

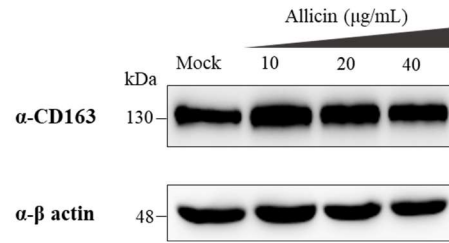

**Figure S1.** Allicin exhibits no inhibitory effect on CD163 expression in PAMs. PAMs were treated with allicin at concentrations of 10, 20, and 40  $\mu$ g/mL or mock treated for 12 h. The expression of CD163 was evaluated by Western analysis, and the expression of  $\beta$ -actin was monitored as an internal control.

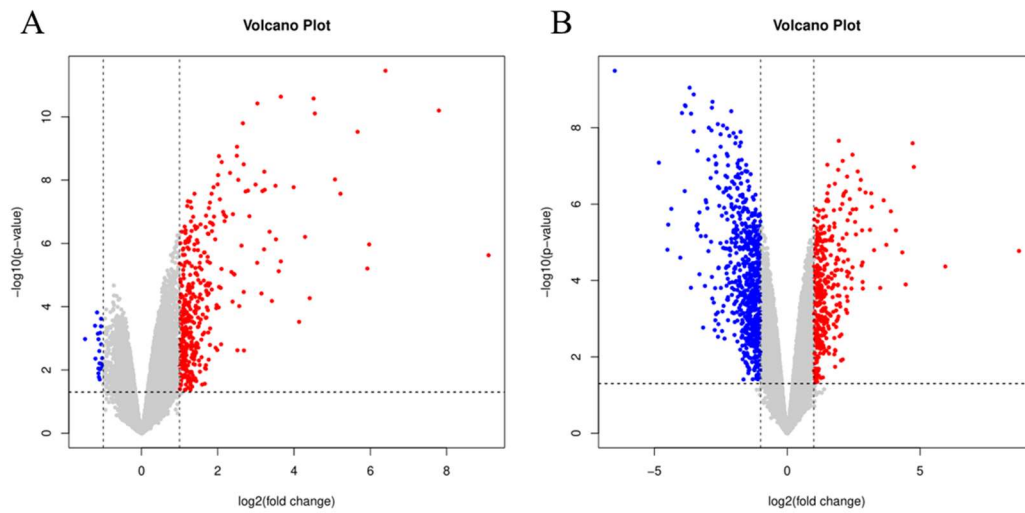

**Figure S2.** Volcano plot analysis of the differentially expressed genes induced by PRRSV infection or allicin treatment. Differentially expressed genes (DEG) were determined using thresholds of  $|\log_2(\text{fold change})| > 1$  and  $\text{p-value} < 0.05$ . (A) DEG between PRRSV infection and mock infection; (B) DEG between PRRSV infection/allicin treatment and PRRSV infection.
